# Supplementary material for: Aqueous photo(electro)catalysis with eumelanin thin films
Source: Royal Society of Chemistry journal article supplement (doi:10.1039/c8mh00715b), 2018-01-01
Supplement: c8mh00715b1.pdf [file c8mh00715b1.pdf]

Supplementary Information

**Aqueous photo(electro)catalysis with eumelanin thin films**

Ludovico Migliaccio, Maciej Gryszel, Vedran Đerek, Alessandro Pezzella, Eric Daniel Głowacki\*

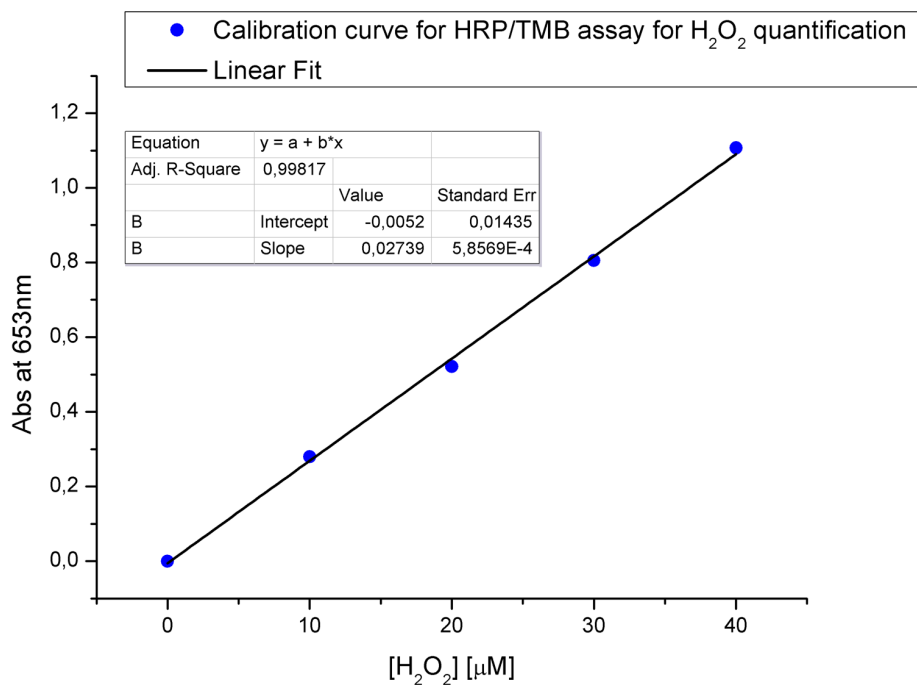

**Fig. S1.** Example calibration curve for the horseradish peroxidase/tetramethyl benzidine peroxide assay.

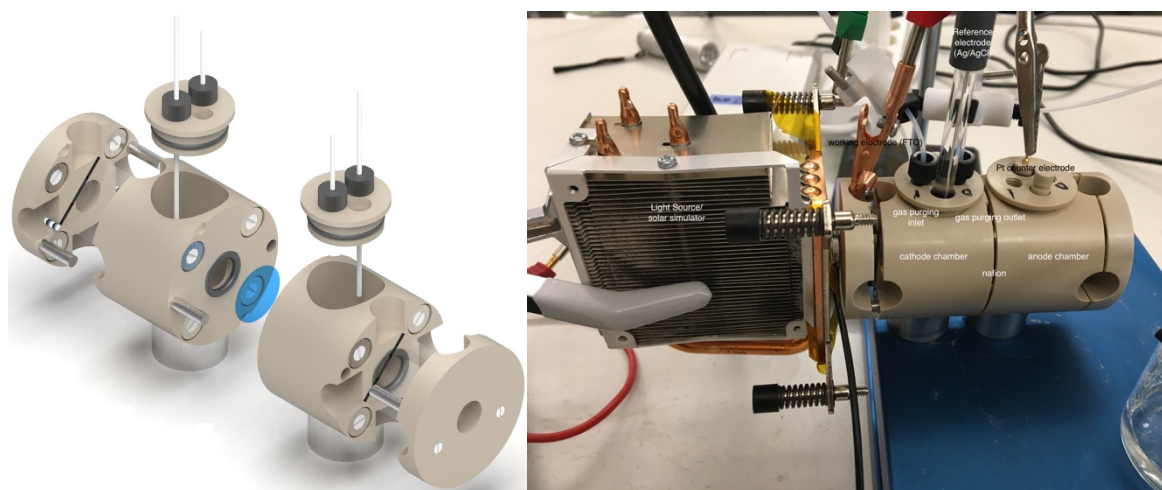

**Fig. S2.** Photoelectrochemical H-cell measurement configuration with Eumelanin modified FTO as the working electrode. Aqueous electrolytes in the pH range 1-7 were used, purged with either O<sub>2</sub> or Ar.

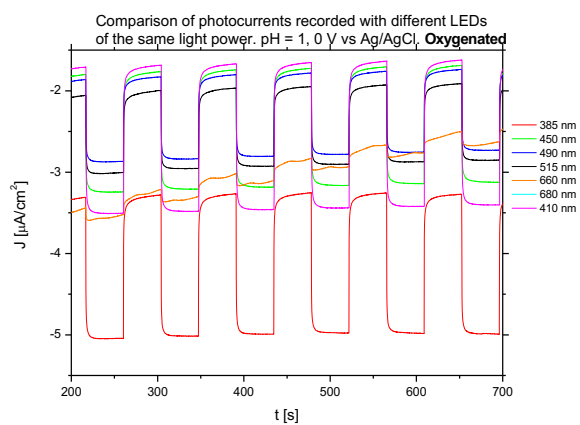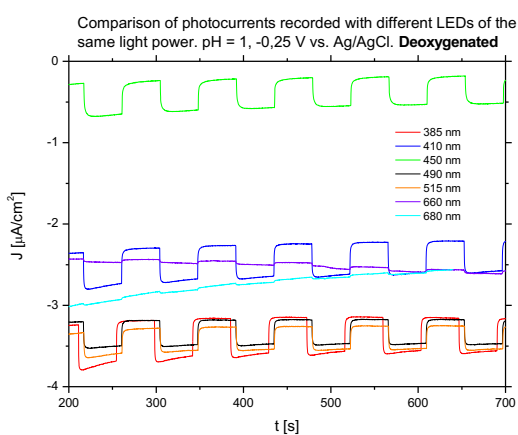

**Fig. S3. Chronoamperometric** photocurrents used to construct the photocurrent action spectra Fig. 3c and 4b. in Oxygenated system (top). Deoxygenated system (bottom).
